# Supplementary material for: Facile Synthesis of 4,4′-biphenyl Dicarboxylic Acid-Based Nickel Metal Organic Frameworks with a Tunable Pore Size towards High-Performance Supercapacitors
Source: Nanomaterials (Basel). 2022 Jun 15;12(12):2062. doi: 10.3390/nano12122062 (PMC9227198; doi:10.3390/nano12122062)
Supplement: Supplementary file 1 [file nanomaterials-12-02062-s001.zip › nanomaterials-1735766-supplementary.pdf]

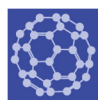

## Supplementary Material

# Facile Synthesis of 4, 4'-biphenyl Dicarboxylic Acid-Based Nickel Metal Organic Frameworks with a Tunable Pore Size towards High-Performance Supercapacitors

Wenlei Zhang <sup>1</sup>, Hongwei Yin <sup>1</sup>, Zhichao Yu <sup>1</sup>, Xiaoxia Jia <sup>1</sup>, Jianguo Liang <sup>2</sup>, Gang Li <sup>1,3,\*</sup>, Yan Li <sup>2</sup> and Kaiying Wang <sup>1,4,\*</sup>

- <sup>1</sup> Institute of Energy Innovation, College of Materials Science and Engineering & College of Information and Computer, Taiyuan University of Technology, Taiyuan 030024, China; zhangwenlei@tyut.edu.cn (W.Z.); yinhongwei@tyut.edu.cn (H.Y.); yuzhichao@tyut.edu.cn (Z.Y.); jiaxiaoxia@tyut.edu.cn (X.J.)
- <sup>2</sup> College of Mechanical and Vehicle Engineering, Taiyuan University of Technology, Taiyuan 030024, China; liangjianguo20@tyut.edu.cn
- <sup>3</sup> College of Physics and Information Engineering, Minnan Normal University, Zhangzhou 361000, China; liyan\_nmsd@163.com
- <sup>4</sup> Department of Microsystems-IMS, University of South-Eastern Norway, 3184 Horten, Norway
- \* Correspondence: ligang02@tyut.edu.cn (G.L.); kaiying.wang@usn.no (K.W.)

**Citation:** Zhang, W.; Yin, H.; Yu, Z.; Jia, X.; Liang, J.; Li, G.; Li, Y. Facile Synthesis of 4, 4'-biphenyl Dicarboxylic Acid-Based Nickel Metal Organic Frameworks with a Tunable Pore Size towards High-Performance Supercapacitors. *Nanomaterials* **2022**, *12*, 2062. <https://doi.org/10.3390/nano12122062>

Academic Editor: Jung Woo Lee

Received: 5 May 2022

Accepted: 13 June 2022

Published: 15 June 2022

**Publisher's Note:** MDPI stays neutral with regard to jurisdictional claims in published maps and institutional affiliations.

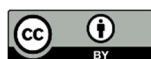

**Copyright:** © 2022 by the authors. Submitted for possible open access publication under the terms and conditions of the Creative Commons Attribution (CC BY) license (<https://creativecommons.org/licenses/by/4.0/>).

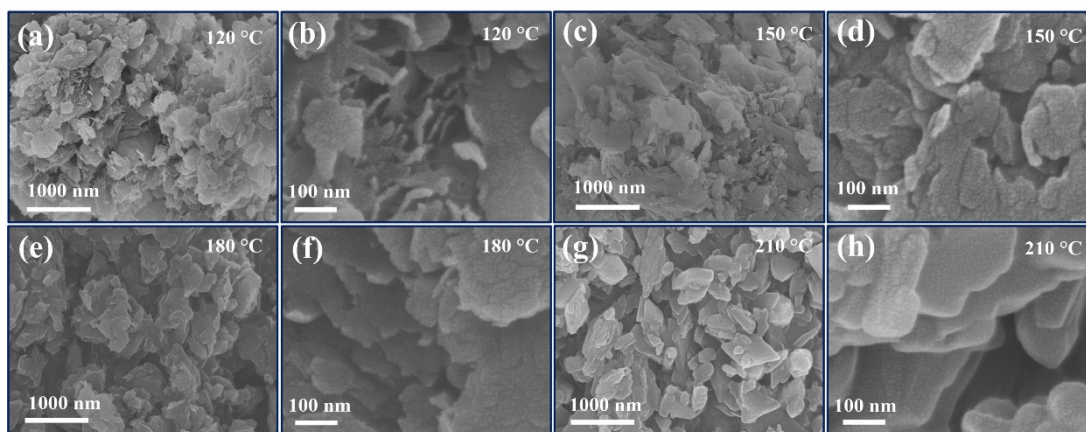

**Figure S1.** SEM graphs of Ni-BPDC-MOF samples with different hydrothermal temperature. (a,b) Sample synthesized at 120 °C. (c,d) Sample synthesized at 150 °C. (e,f) Sample synthesized at 180 °C. (g,h) Sample synthesized at 210 °C.

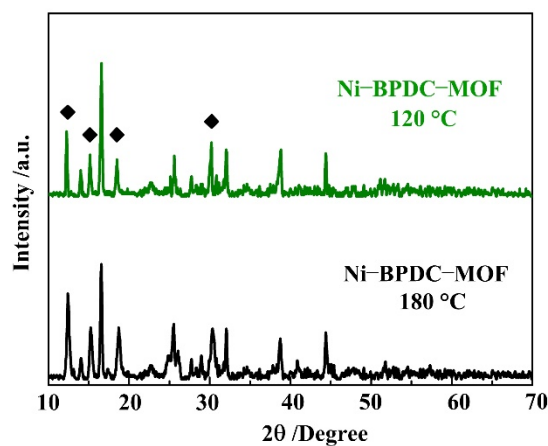

**Figure S2.** XRD patterns of Ni-BPDC-MOF with hydrothermal temperatures of 120 °C and 180 °C. The characteristic diffraction peaks of Ni-BPDC-MOF are remarked in diamond pattern.

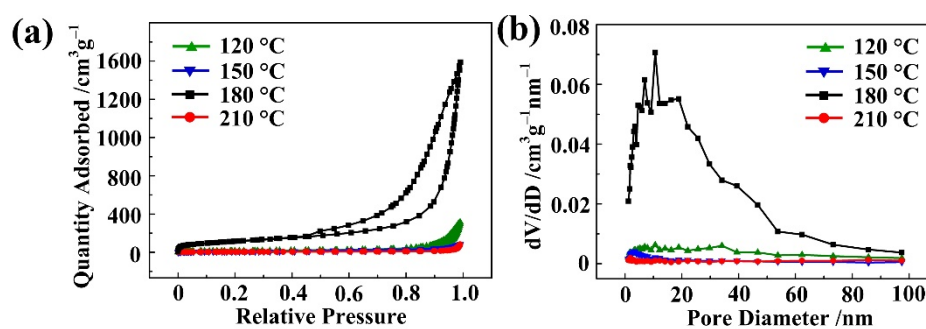

**Figure S3.** (a) N<sub>2</sub> adsorption/desorption isotherms and (b) corresponding pore size distribution curve of Ni-BPDC-MOF samples with different hydrothermal temperature.

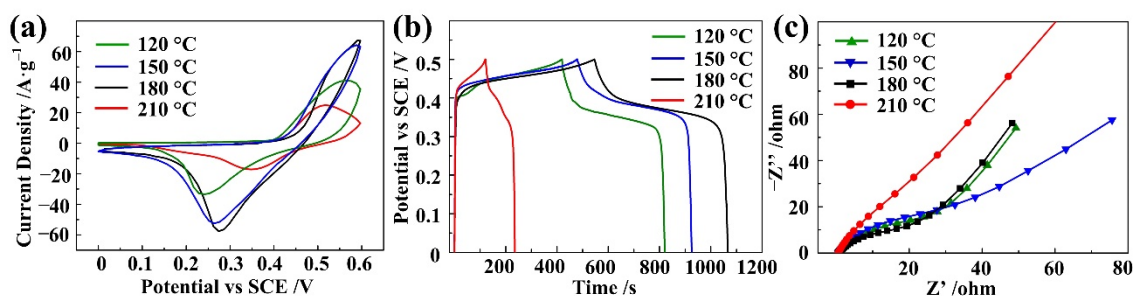

**Figure S4.** Capacitance performances of Ni-BPDC-MOF samples with different hydrothermal temperature. (a) CV curves at scan rate of 100 mV·s<sup>-1</sup>. (b) GCD curves at current density of 0.5 A·g<sup>-1</sup>. (c) Nyquist plots.

**Table S1.** The comparison for porosity and supercapacitive performance of Ni-BPDC-MOF samples with different hydrothermal temperature. The capacitance was calculated from GCD curves with current density of 0.5 F·g<sup>-1</sup>.

| Synthesized Temperature | Surface Area (m <sup>2</sup> ·g <sup>-1</sup> ) | Average Diameter (nm) | $R_{ct}$ (Ω) | $R_s$ (Ω)   | Capacitance (F·g <sup>-1</sup> ) |
|-------------------------|-------------------------------------------------|-----------------------|--------------|-------------|----------------------------------|
| 120 °C                  | 137.72                                          | 12.54                 | 21.43        | 0.52        | 400                              |
| 150 °C                  | 87.10                                           | 8.69                  | 21.08        | 0.61        | 448                              |
| <b>180 °C</b>           | <b>311.99</b>                                   | <b>29.16</b>          | <b>18.55</b> | <b>0.49</b> | <b>521</b>                       |
| 210 °C                  | 62.00                                           | 7.54                  | 36.22        | 0.45        | 116                              |
